# Supplementary material
Source: PubMed Central journal article supplement (PMC2797180)
Supplement: supp_M109.037614_Supplemental-3.pdf [file supp_M109.037614_Supplemental-3.pdf]

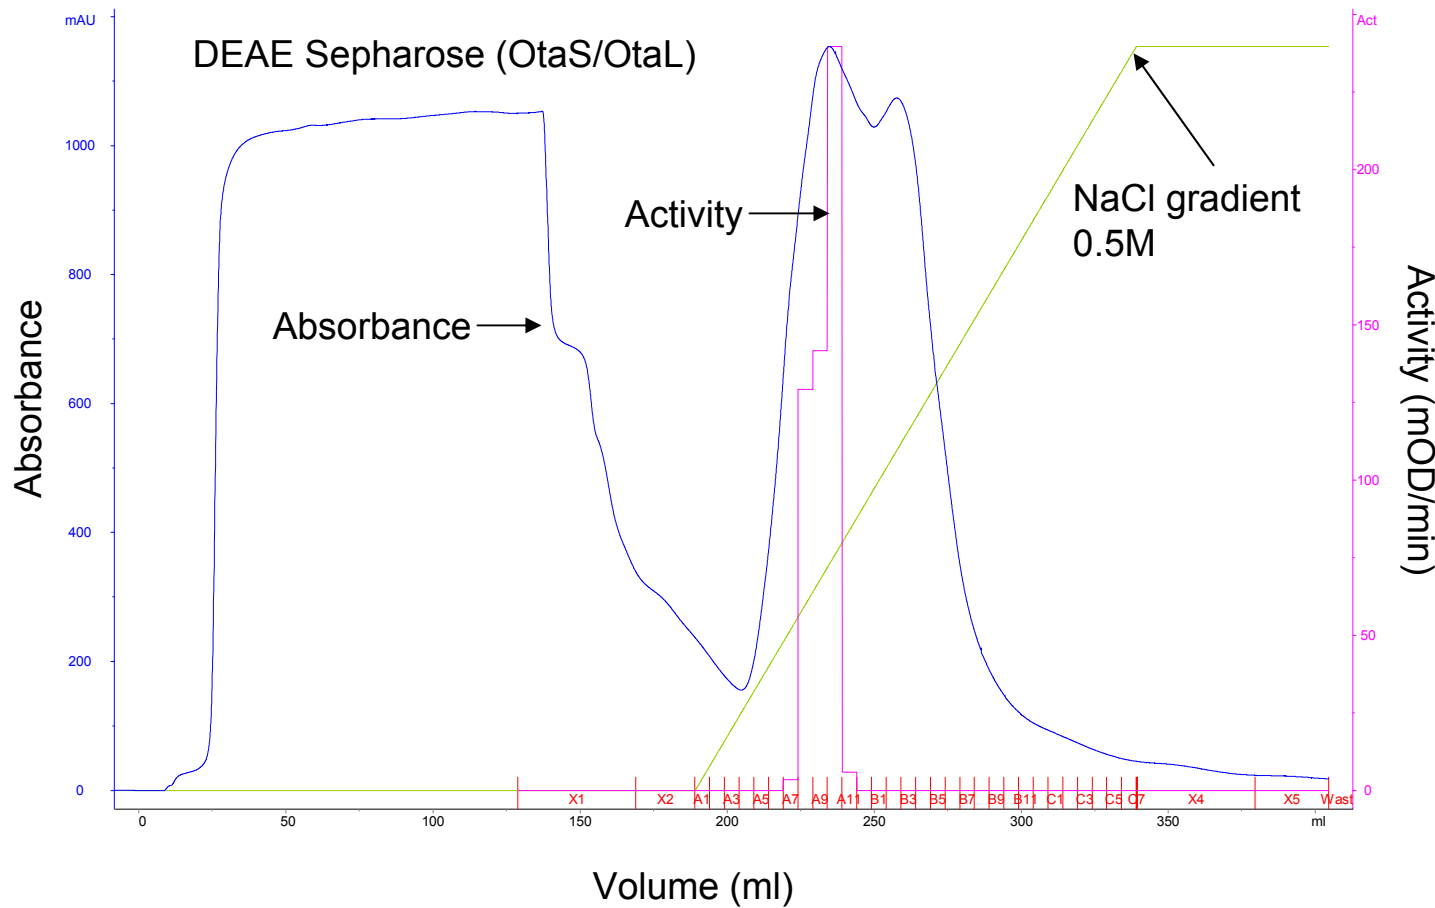

Supplemental Fig. 3. Chromatogram for the purification of OtaS/OtaL using a 30mL DEAE Sepharose column
