# Supplementary material
Source: PubMed Central journal article supplement (PMC2797180)
Supplement: supp_M109.037614_Supplemental-5.pdf [file supp_M109.037614_Supplemental-5.pdf]

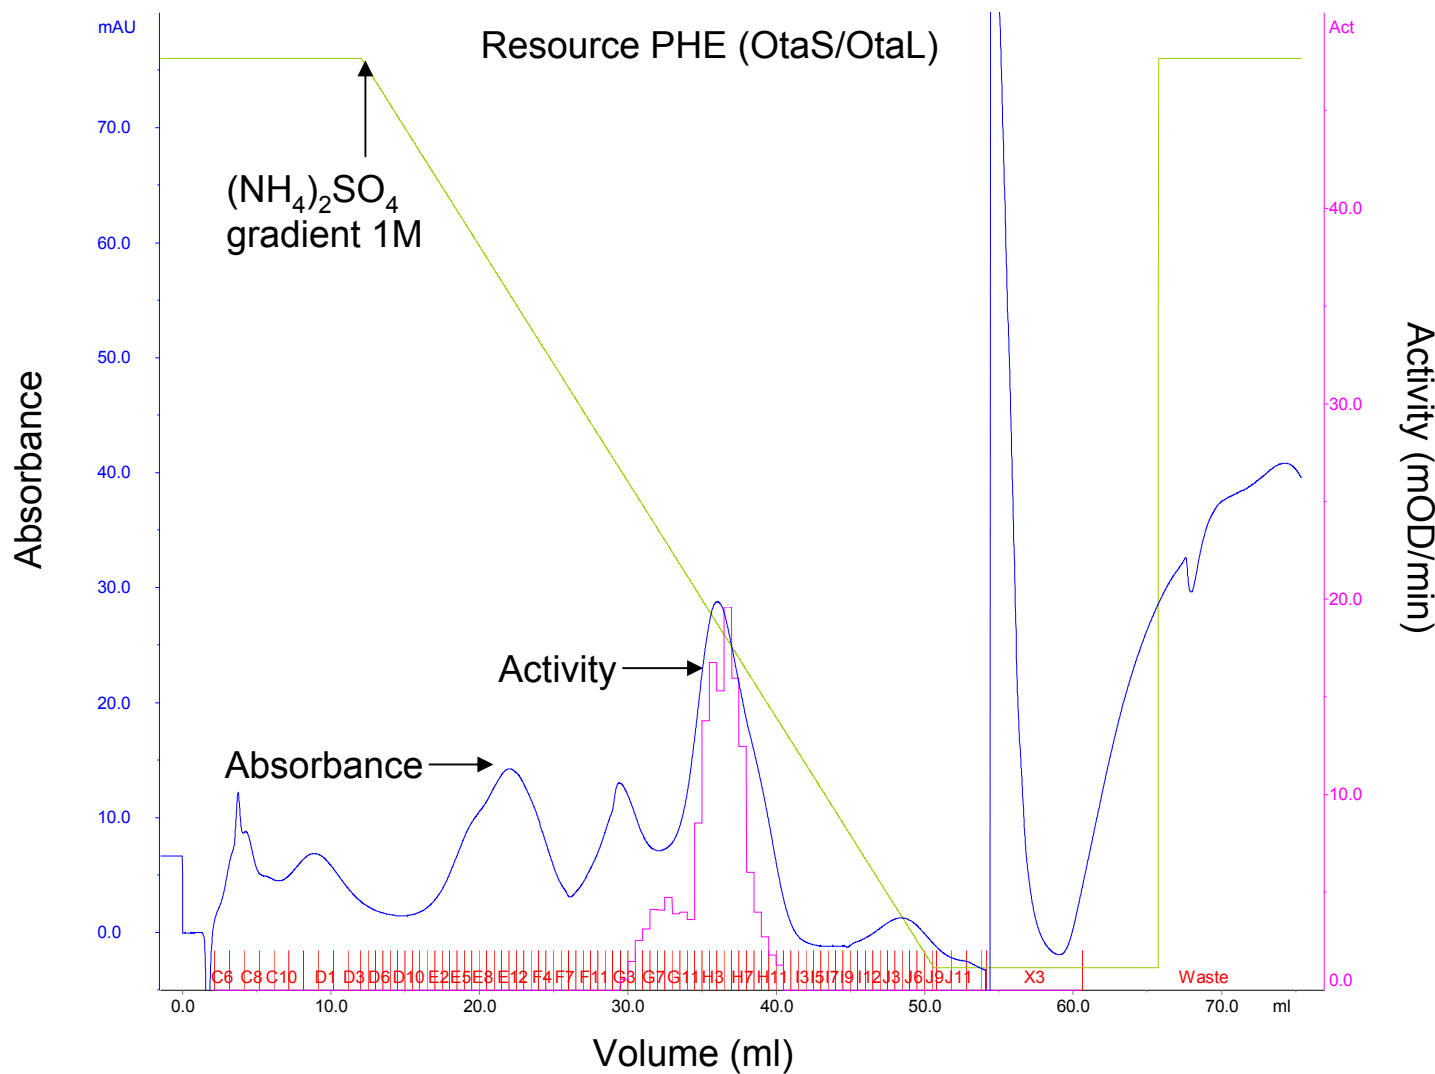

Supplemental Fig. 5. Chromatogram for the purification of OtaS/OtaL using 2-1mL Resource PHE columns in tandem.
