# Supplementary material
Source: PubMed Central journal article supplement (PMC2797180)

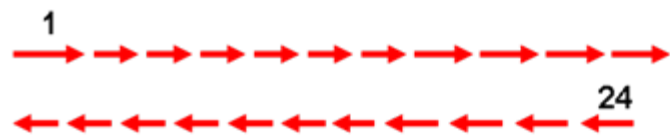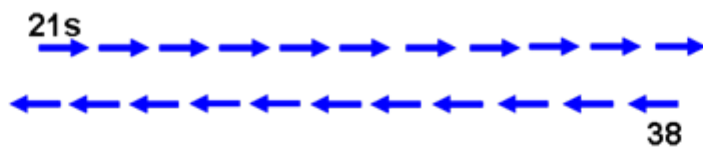

OtaS

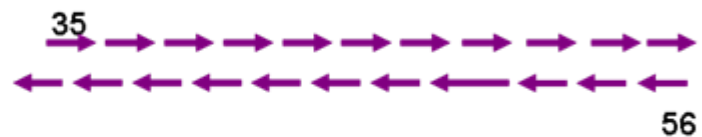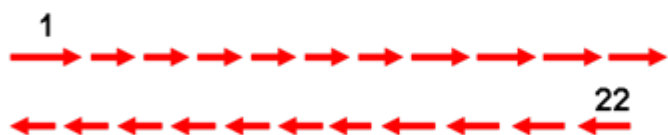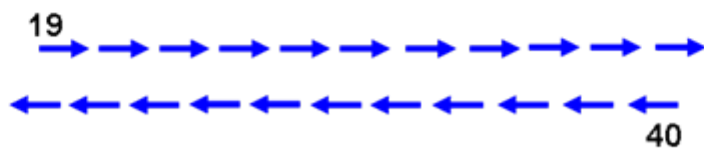

OtaL

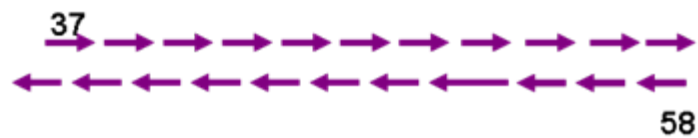

Supplement: supp_M109.037614_Fig2.pdf [file supp_M109.037614_Fig2.pdf]

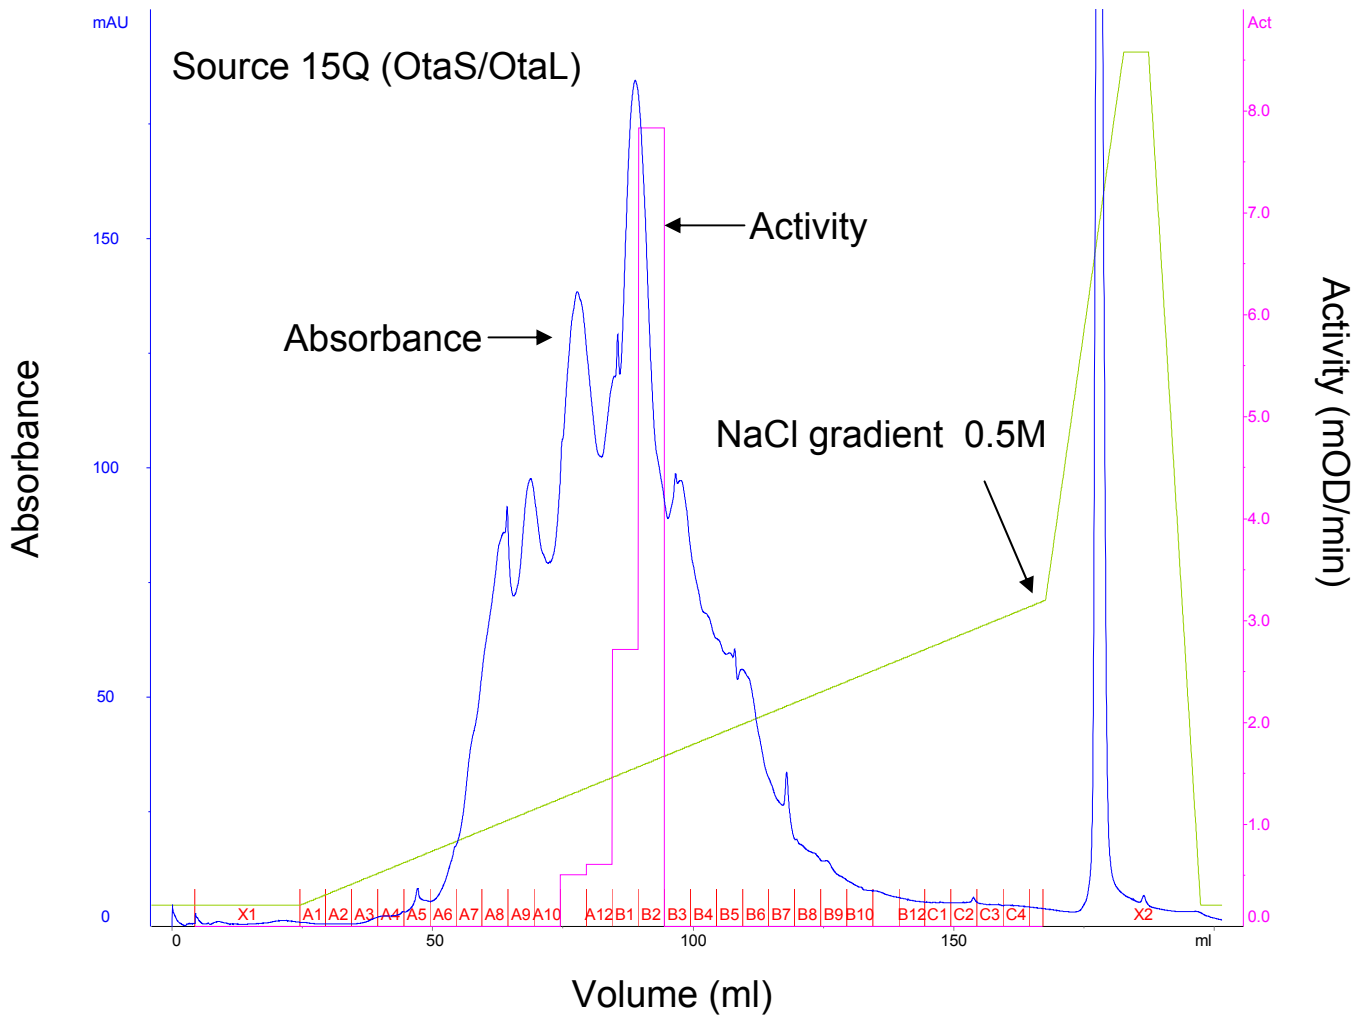

Supplemental Fig. 4. Chromatogram for the purification of OtaS/OtaL using a 10mL Source 15Q column

Supplement: supp_M109.037614_Supplemental-4.pdf [file supp_M109.037614_Supplemental-4.pdf]

# Gene Synthesis *Ostreococcus*

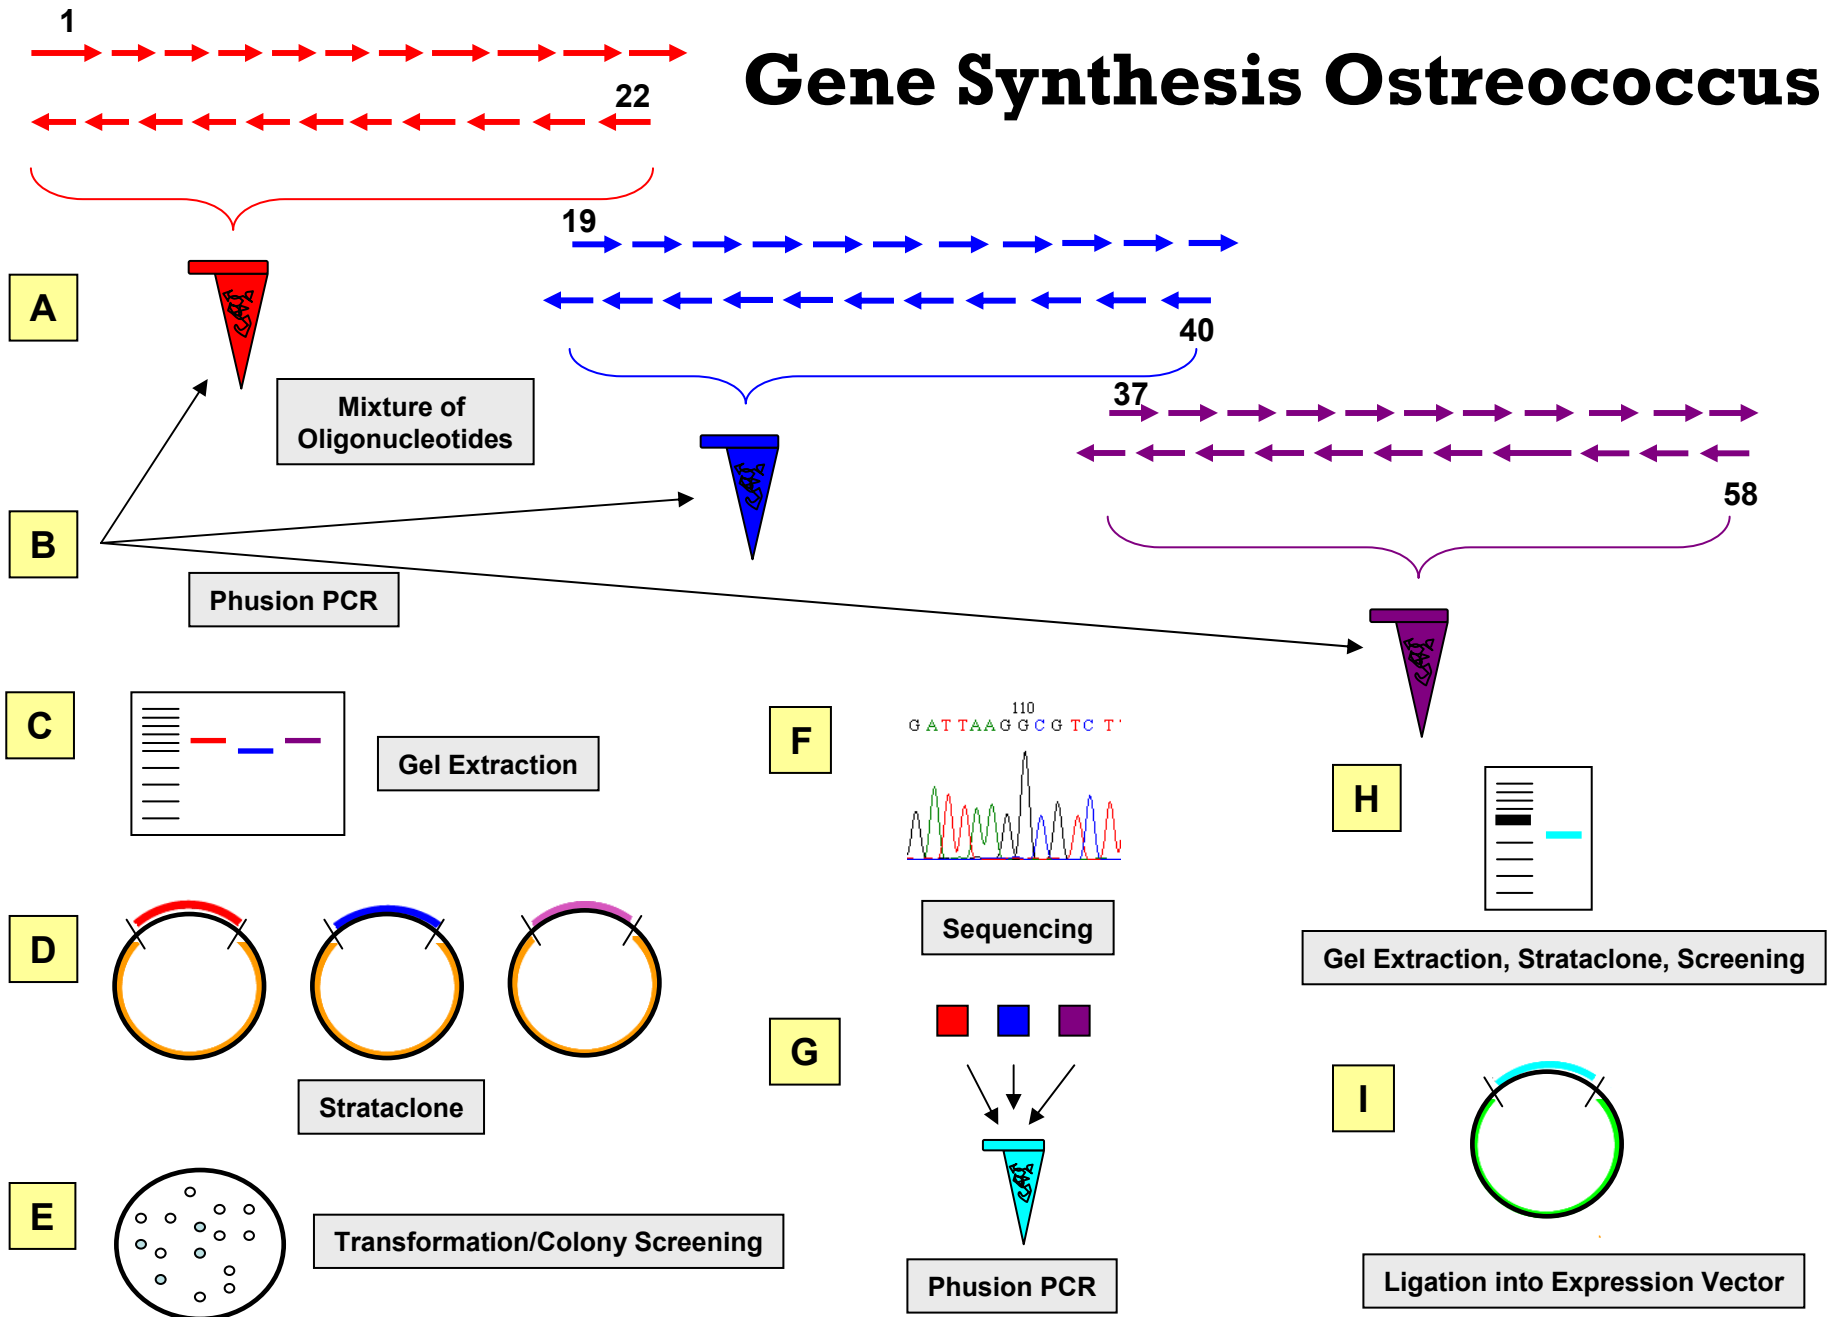

Supplement: supp_M109.037614_Supplemental_Fig1.pdf [file supp_M109.037614_Supplemental_Fig1.pdf]
